# Supplementary material for: ID1 promotes hepatocellular carcinoma proliferation and confers chemoresistance to oxaliplatin by activating pentose phosphate pathway
Source: Springer Nature journal article supplement (doi:10.1186/s13046-017-0637-7), 2017-11-23

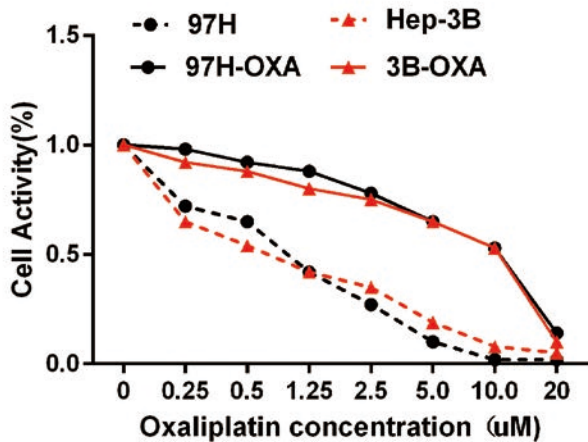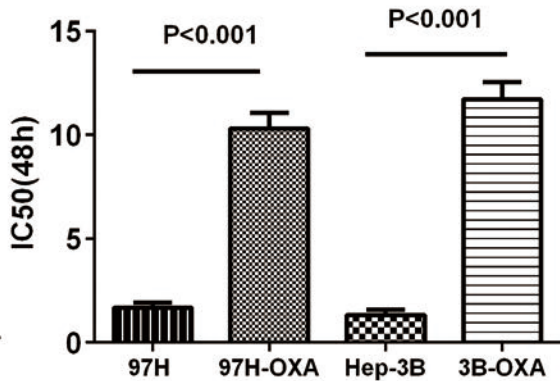

Supplement: MOESM1 [file 15249292]
